# Supplementary material for: Risk of Second Primary Malignancies among Patients with Early Gastric Cancer Exposed to Recurrent Computed Tomography Scans
Source: MDPI journal article supplement (doi:10.3390/cancers13051144), 2021-03-07
Supplement: s1 [file s1]

Supplementary Materials

# Risk of Second Primary Malignancies among Patients with Early Gastric Cancer Exposed to Recurrent Computed Tomography Scans

Tae Jun Kim, Yeong Chan Lee, Yang Won Min, Hyuk Lee, Byung-Hoon Min, Jun Haeng Lee, Hong-Hee Won, Kyoung Doo Song, Woo Kyoung Jeong and Jae J. Kim

Table S1. ICD-10 codes for comorbidities.

| Covariates                       | ICD-10 code                                                                                                                                          |
|----------------------------------|------------------------------------------------------------------------------------------------------------------------------------------------------|
| Myocardial infarction            | I21, I22, I252                                                                                                                                       |
| Congestive heart failure         | I43, I50, I099, I110, I130, I132, I255, I420, I425, I426, I427, I428, I429, P290                                                                     |
| Peripheral vascular dis.         | I70, I71, I731, I738, I739, I771, I790, I792, K551, K558, K559, Z958, Z959                                                                           |
| Cerebrovascular dis.             | G45, G46, I60, I61, I62, I63, I64, I65, I66, I67, I68, I69, H340                                                                                     |
| Dementia                         | F00, F01, F02, F03, G30, F051, G311                                                                                                                  |
| Chronic pulmonary dis.           | J40, J41, J42, J43, J44, J45, J46, J47, J60, J61, J62, J63, J64, J65, J66, J67, I278, I279, J684, J701, J703                                         |
| Connective tissue dis.           | M05, M32, M33, M34, M06, M315, M351, M353, M360                                                                                                      |
| Peptic ulcer dis.                | K25, K26, K27, K28                                                                                                                                   |
| Diabetes (without complications) | E100, E101, E106, E108, E109, E110, E111, E116, E118, E119, E120, E121, E126, E128, E129, E130, E131, E136, E138, E139, E140, E141, E146, E148, E149 |
| Diabetes (with complications)    | E102, E103, E104, E105, E107, E112, E113, E114, E115, E117, E122, E123, E124, E125, E127, E132, E133, E134, E135, E137, E142, E143, E144, E145, E147 |
| Paraplegia/hemiplegia            | G81, G82, G041, G114, G800, G830, G831, G832, G833, G834, G839                                                                                       |
| Mild liver disease               | B18, K73, K74, K700, K701, K702, K703, K709, K717, K713, K714, K715, K760, K762, K763, K764, K768, K769, Z944                                        |
| Moderate or severe liver disease | K704, K711, K721, K729, K765, K766, K767, I850, I859, I864, I982                                                                                     |
| Renal disease                    | N18, N19, N052, N053, N054, N055, N056, N057, N250, I120, I131, N032, N033, N034, N035, N036, N037, Z490, Z491, Z492, Z940, Z992                     |

ICD-10 = International Classification of Diseases, 10th Revision.

Table S2. Indications/reasons for CT.

| Indications/reasons                                  | Number of CT scans (total number: 32,650) |
|------------------------------------------------------|-------------------------------------------|
| Gastric cancer diagnosis and surveillance            | 31,405                                    |
| Abdominal pain                                       | 115                                       |
| Colorectal cancer screening                          | 21                                        |
| Gastrointestinal bleeding                            | 7                                         |
| Gallbladder or biliary stones                        | 59                                        |
| Abdominal lymphadenopathy                            | 5                                         |
| Hematuria                                            | 18                                        |
| Pancreatitis                                         | 21                                        |
| Appendicitis                                         | 10                                        |
| Angiomyolipoma                                       | 5                                         |
| Hepatic benign nodule (cyst, abscess, or hemangioma) | 64                                        |
| Hepatocellular carcinoma surveillance                | 239                                       |
| Benign adrenal nodule                                | 28                                        |

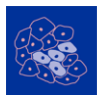

---

|                                                                                             |     |
|---------------------------------------------------------------------------------------------|-----|
| Renal cyst                                                                                  | 33  |
| Inflammatory bowel syndrome                                                                 | 1   |
| Fever of unknown origin                                                                     | 4   |
| Hydronephrosis or urinary stones                                                            | 54  |
| Abdominal hernia                                                                            | 2   |
| Pancreas cyst                                                                               | 28  |
| Primary biliary cirrhosis                                                                   | 1   |
| Traffic accident                                                                            | 3   |
| Diverticulosis                                                                              | 4   |
| Abdominal aortic aneurysm, abdominal<br>hematoma, ischemic colitis, or venous<br>thrombosis | 14  |
| Check-up for malignancy                                                                     | 509 |

---

**Table S3.** Risk of intra-abdominal SPMs following abdominopelvic CT scans in selected population subgroups.

| Subgroup                                                           | ≤8 CT scans<br>Incidence rate<br>(per 1,000 person-years) | >8 CT scans<br>Incidence rate<br>(per 1,000 person-years) | HR (95% CI)       | P for interaction |
|--------------------------------------------------------------------|-----------------------------------------------------------|-----------------------------------------------------------|-------------------|-------------------|
| Age                                                                |                                                           |                                                           |                   | 0.53              |
| <50 years                                                          | 2.93                                                      | 14.51                                                     | 3.69 (0.82–16.56) |                   |
| ≥50 years                                                          | 8.18                                                      | 23.67                                                     | 2.61 (1.53–4.46)  |                   |
| Sex                                                                |                                                           |                                                           |                   | 0.06              |
| Male                                                               | 8.28                                                      | 20.45                                                     | 2.03 (1.10–3.76)  |                   |
| Female                                                             | 3.39                                                      | 25.68                                                     | 7.51 (3.10–18.21) |                   |
| Smoking                                                            |                                                           |                                                           |                   | 0.10              |
| Never                                                              | 5.68                                                      | 24.77                                                     | 4.37 (2.35–8.12)  |                   |
| Past or current smoker                                             | 8.71                                                      | 17.41                                                     | 1.62 (0.66–3.99)  |                   |
| CCI                                                                |                                                           |                                                           |                   | 0.16              |
| <2                                                                 | 6.39                                                      | 22.74                                                     | 3.25 (1.93–5.49)  |                   |
| ≥2                                                                 | 11.39                                                     | 17.86                                                     | 1.47 (0.34–6.24)  |                   |
| Chronic hepatitis or liver<br>cirrhosis<br>(K74.6 K70.3 K76.7 B18) |                                                           |                                                           |                   | 0.04              |
| No                                                                 | 6.20                                                      | 21.33                                                     | 3.34 (1.91–5.86)  |                   |
| Yes                                                                | 21.15                                                     | 24.68                                                     | 1.45 (0.48–4.37)  |                   |

Estimated from Cox proportional hazard models adjusted for age, sex, smoking status, and Charlson comorbidity index.

SPM, second primary malignancy; HR, hazards ratio; CI, confidence interval; CCI, Charlson comorbidity index; the weighted sum of the following conditions (myocardial infarction, congestive heart failure, peripheral vascular disease, cerebrovascular disease, dementia, chronic pulmonary disease, connective tissue disease, peptic ulcer disease, diabetes without complications, diabetes with complications paraplegia)

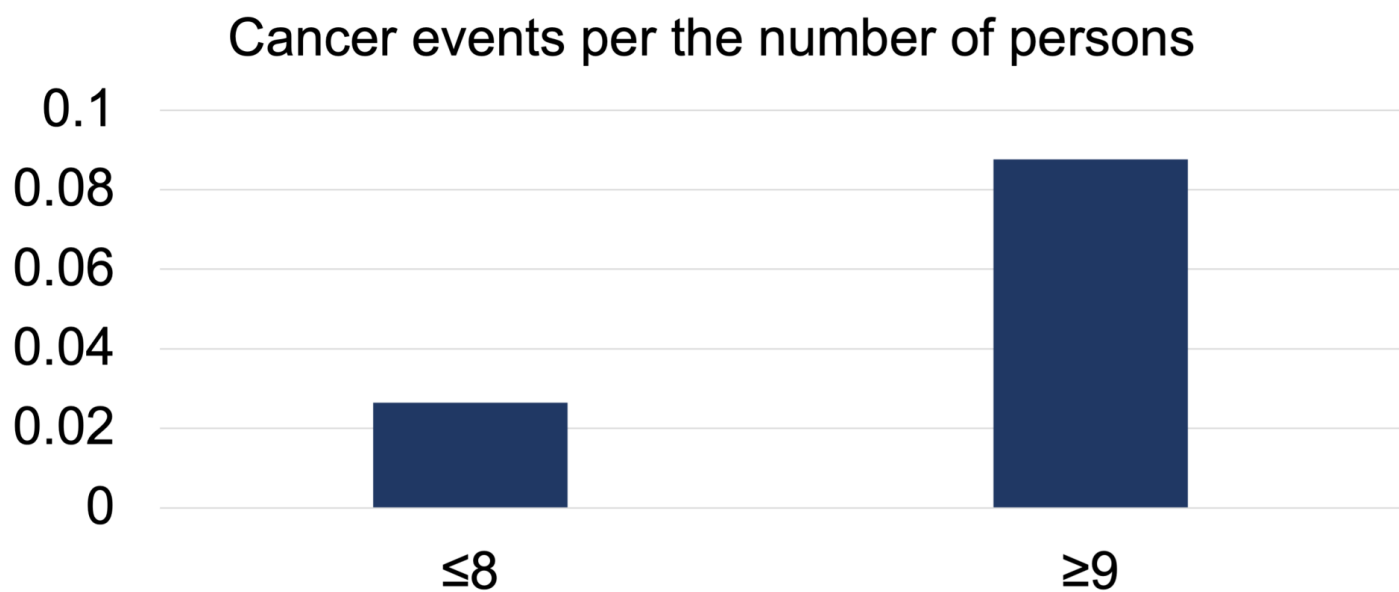

**Figure S1.** Absolute risks for SPMs according to the number of CT scans. The graph depicts absolute risks (y-axis) between SPMs and the number of abdominopelvic CT scans (x-axis). SPM, second primary malignancy; CT, computed tomography.
